# Supplementary material
Source: PubMed Central journal article supplement (PMC11549940)
Supplement: NIHMS2030323-supplement-1.pdf [file NIHMS2030323-supplement-1.pdf]

|        |                                                |                                                                                                                                                                                                                                                                                                                                                                                                                        |
|--------|------------------------------------------------|------------------------------------------------------------------------------------------------------------------------------------------------------------------------------------------------------------------------------------------------------------------------------------------------------------------------------------------------------------------------------------------------------------------------|
| ASV351 | Lachnospiraceae_null_null_15                   | CAGTGGGGAATATTGCACAATGGGGGAAACCCCTGATGCAGCAGCCGCGTGAGTGAAGAAGTATTTCCGGTATGTAAGCTCTATCAGCAGGGAAGATAATGACGGTACCTGACTAAGAAGCTCCGGCTAAATACGTGCCAGCAGCCCGGTAATACGTATGGAGCAAGCGTTATCCGGATTACTGGGTGTAAGGGGAGCGTAGGTCAGTGGCAGTCAAGTCAAGTGAAGGCCCGGGCTCAACCCCGGGACTGCAATTTGAAACTGCTCGGCTAGAGTACAGGAGAGGCGAGCCGGAATTCCTAGTGTAGCGGTGAAATGCGTAGATATTAGGAGGAACACCAGTGGCGAAGGCGGCTTACTGGACGATTAACCTGACACTGAGGCACGAAAGCGTGGGGAGC      |
| ASV486 | Lachnospiraceae_null_null_17                   | CAGTGGGGAATATTGCACAATGGGGGAAACCCCTGATGCAGCAGCCGCGTGATGAAGAAGTATTTCCGGTATGTAAGCTCTATCAGCAGGGAAGAAAATGACGGTACCTGACTAAGAAGCCCGGCTAACTACGTGCCAGCAGCCCGGTAATACGTATGGGSGCAAGCGTTATCCGGATTACTGGGTGTAAGGGGAGCGTAGGCGGTGCGCAAGCCAGAGTGAAGGCCCGGGCTAAACCCCGGGACTGCTTTTGGAACTGTTAGACTAGAGTGTCCGAGAGGTAAAGTGAATTCCTAGTGTAGCGGTGAAATGCGTAGATATTAGGAGGAACACCACTGGCGAAGGCGGCTTACTGGACGATAACTGACGCTGAGGCTCGAAAGCGTGGGGAGC              |
| ASV251 | Lachnospiraceae_null_null_6                    | CAGTGGGGAATATTGCACAATGGGGGAAACCCCTGATGCAGCAGCCGCGTGAGCGATGAAGTATTTCCGGTATGTAAGCTCTATCAGCAGGGAAGAAAATGACGGTACCTGACTAAGAAGCCCGGCTAAATACGTGCCAGCAGCCCGGTAATACGTATGGTGCAGCGTTATCCGGATTACTGGGTGTAAGGGGAGCGTAGAGCGGAGTGGCAAGTCTGATGTGAAACCCCGGGCTCAACCCCGGGACTGCAATTTGAAACTGCTCGGACTAGAGTGTCCGAGAGGTAAAGCGGAATTCCTAGTGTAGCGGTGAAATGCGTAGATATTAGGAGGAACACCAGTGGCGAAGGCGGCTTACTGGACGATTAACCTGACGCTGAGGCTCGAAAGCGTGGGGAGC       |
| ASV281 | Lachnospiraceae_null_null_8                    | CAGTGGGGAATATTGCACAATGGGGGAAACCCCTGATGCAGCAGCCGCGTGAGTGAAGAAGTATTTCCGGTATGTAAGCTCTATCAGCAGGGAAGAAAATGACGGTACCTGACTAAGAAGCCCGGCTAACTACGTGCCAGCAGCCCGGTAATACGTATGGGSGCAAGCGTTATCCGGATTACTGGGTGTAAGGGGAGCGTAGAGCGTAAAGCAAGTGAAGGCCCGGGCTCAACCCCGGGACTGCTTTTGGAACTGTTGACTGGAGTGTCCGAGAGGTAAAGCGGAATTCCTAGTGTAGCGGTGAAATGCGTAGATATTAGGAGGAACACCAGTGGCGAAGGCGGCTTACTGGACGATAACTGACGCTGAGGCTCGAAAGCGTGGGGAGC                  |
| ASV99  | Lachnospiraceae_Roseburia_hominis              | CAGTGGGGAATATTGCACAATGGGGGAAACCCCTGATGCAGCAGCCGCGTGAGCGAAGAAGTATTTCCGGTATGTAAGCTCTATCAGCAGGGAAGAAAATGACGGTACCTGACTAAGAAGCCCGGCTAAATACGTGCCAGCAGCCCGGTAATACGTATGGTGCAGCGTTATCCGGATTACTGGGTGTAAGGGGAGCGTAGAGCGGTACGGCAAGTCTGATGTGAAACCCCGGGCTCAACCCCGGGACTGCAATTTGAAACTGCTCGGACTAGAGTGTCCGAGAGGTAAAGCGGAATTCCTAGTGTAGCGGTGAAATGCGTAGATATTAGGAGGAACACCAGTGGCGAAGGCGGCTTACTGGACGATTAACCTGACGCTGAGGCTCGAAAGCGTGGGGAGC       |
| ASV95  | Lachnospiraceae_Roseburia_intestinalis         | CAGTGGGGAATATTGCACAATGGGGGAAACCCCTGATGCAGCAGCCGCGTGAGCGAAGAAGTATTTCCGGTATGTAAGCTCTATCAGCAGGGAAGAAAATGACGGTACCTGACTAAGAAGCCCGGCTAAATACGTGCCAGCAGCCCGGTAATACGTATGGTGCAGCGTTATCCGGATTACTGGGTGTAAGGGGAGCGTAGAGCGGTACGGCAAGTCTGATGTGAAACCCCGGGCTCAACCCCGGGACTGCAATTTGAAACTGCTCGGACTAGAGTGTCCGAGAGGTAAAGCGGAATTCCTAGTGTAGCGGTGAAATGCGTAGATATTAGGAGGAACACCAGTGGCGAAGGCGGCTTACTGGACGATTAACCTGACGCTGAGGCTCGAAAGCGTGGGGAGC       |
| ASV108 | Lachnospiraceae_Roseburia_inullinivorans       | CAGTGGGGAATATTGCACAATGGGGGAAACCCCTGATGCAGCAGCCGCGTGAGCGAAGAAGTATTTCCGGTATGTAAGCTCTATCAGCAGGGAAGAAAATGACGGTACCTGACTAAGAAGCCCGGCTAAATACGTGCCAGCAGCCCGGTAATACGTATGGTGCAGCGTTATCCGGATTACTGGGTGTAAGGGGAGCGTAGAGCGGTACGGCAAGTCTGATGTGAAACCCCGGGCTCAACCCCGGGACTGCAATTTGAAACTGCTCGGACTAGAGTGTCCGAGAGGTAAAGCGGAATTCCTAGTGTAGCGGTGAAATGCGTAGATATTAGGAGGAACACCAGTGGCGAAGGCGGCTTACTGGACGATAACTGACGCTGAGGCTCGAAAGCGTGGGGAGC         |
| ASV28  | Rikenellaceae_Alistipes_null_1                 | CAGTGAGGAATATTGGTCAATGGACGCAAGTCTGAACAGCCATGCCGCTGCAGGAAGACGCTCTATGAGTTGAACTGCTTTTGTACGAGGGTAACTCACCTACCTAGTGTAGGCTGAAAGTATCTGACGAATAAGGATCGGCTCACTCCGTGCCAGCAGCCCGGGTAATACGGAGATTCAACGCTTATCCGGATTATCCGGATTATGGGTTTAAAGGGTGCCTAGGCGGTTTATAAGTTAGAGGTGAAATCCCGGGCTTAACCTCCGGCTTAACTCCGGAACCTGCTTAACTACTGTAGACTAGAGAGTGTCCGGTAGCGGGAATGTATGGTGTAGCGGTGAAATGCTTAGGAGATCATAAGAACCCGATTGCGAAGGACGCTTACCAAACTATATCTGACGTTGA |
| ASV19  | Rikenellaceae_Alistipes_putredinis             | CAGTGAGGAATATTGGTCAATGGACGCAAGTCTGAACAGCCATGCCGCTGCAGGATGACGCTCTATGAGTTGAACTGCTTTTGTACGAGGGTAAACGAGATACGCTATCTGTCTGAAAGTATCTGACGAATAAGGATCGGCTCACTCCGTGCCAGCAGCCCGGGTAATACGGAGATTCAACGCTTATCCGGATTATCCGGATTATGGGTTTAAAGGGTGCCTAGGCGGTTTATAAGTTAGAGGTGAAATCCCGGGCTTAACCTCCGGCTTAACTCCGGAACCTGCTTAACTACTGTTGAGCTAGAGAGTGTCCGGTAGCGGGAATGTATGGTGTAGCGGTGAAATGCTTAGAGATCATAAGAACCCGATTGCGAAGGACGCTTACCAAACTATATCTGACGTTGA  |
| ASV186 | Ruminococcaceae_Butyricoccus_null_1            | CAGTGGGGAATATTGCGCAATGGGGGAAACCCCTGATGCAGCAGCCGCGTGATGAAGAAGGCTTCCGGTTGTAAGATCTTTAATCAGGGACGAAACAAATGACGGTACCTGACTAAGAAGTAAAGTCCGGCTAACTACGTGCCAGCAGCCCGGTAATACGTATGGGAGCACAGCGTTATCCGGATTACTGGGTGTAAGGGGAGCGTAGGCGGGCGGTAAGTTGAAAGTGAATCTATGGGCTTAAACCCATAAACCTTTCAAACCTGCTGGCTTGAAGTGTGAGTGTGAGGAGGCGAGCGGAATTCCTGGTGTAGCGGTGAAATGCGTAGATATTAGGAGGAACACCAGTGGCGAAGGCGGCTTACTGGACGATAACTGACGCTGAGGCGGAAAGCGTGGGGAGC   |
| ASV22  | Ruminococcaceae_Faecalibacterium_CM04-06       | CAGTGGGGAATATTGCACAATGGGGGAAACCCCTGATGCAGCAGCCGCGTGAGGGAAGAAGGCTTCCGGATTGTAAGCTCCTGTGTTGAGGAAGATAATGACGGTACTCAACAAGGAAGTACGGCTAACTACGTGCCAGCAGCCCGGTAATACGTATGGTGCAGAGCGTTGTCGGGAATTACTGGGTGTAAGGGGAGCGTAGGCGGGGAGAACAAAGTTGAAAGTGAATCCATGGGCTCAACCCATGAAGTGCCTTTCAAACCTGCTTGAAGTGTGAGTGTGAGGAGGTAGCGGGAATTCCTGGTGTAGCGGTGAAATGCGTAGATATTAGGAGGAACACCAGTGGCGAAGGCGGCTTACTGGACCAACTGACGCTGAGGCTCGAAAGTGTGGGTAGC         |
| ASV9   | Ruminococcaceae_Faecalibacterium_null_1        | CAGTGGGGAATATTGCACAATGGGGGAAACCCCTGATGCAGCAGCCGCGTGAGGGAAGAAGGCTTCCGGATTGTAAGCTCCTGTGTTGGGGAAAGATAATGACGGTACCAACAAGGAAGTACGGCTAACTACGTGCCAGCAGCCCGGTAATACGTATGGTGCAGAGCGTTGTCGGGAATTACTGGGTGTAAGGGGAGCGTAGGCGGGGAGAACAAAGTTGAAAGTGAATCTATGGGCTCAACCCATAAAGTGCCTTTCAAACCTGTTTTTCTTGAAGTGTGAGAGGTAGCGGGAATTCCTGGTGTAGCGGTGAAATGCGTAGATATTAGGAGGAACACCAGTGGCGAAGGCGGCTTACTGGACCAACTGACGCTGAGGCTCGAAAGTGTGGGTAGC           |
| ASV155 | Ruminococcaceae_Faecalibacterium_null_2        | CAGTGGGGAATATTGCACAATGGGGGAAACCCCTGATGCAGCAGCCGCGTGAGGGAAGAAGGCTTCCGGATTGTAAGCTCCTGTGTTGAGGAAGATAATGACGGTACTCAACAAGGAAGTACGGCTAACTACGTGCCAGCAGCCCGGTAATACGTATGGTGCAGAGCGTTGTCGGGAATTACTGGGTGTAAGGGGAGCGTAGGCGGGGAGAACAAAGTTGAAAGTGAATCCATGGGCTCAACCCATGAAGTGCCTTTCAAACCTGCTTGAAGTGTGAGTGTGAGGAGGTAGCGGGAATTCCTGGTGTAGCGGTGAAATGCGTAGATATTAGGAGGAACACCAGTGGCGAAGGCGGCTTACTGGACCAACTGACGCTGAGGCTCGAAAGTGTGGGTAGC         |
| ASV10  | Ruminococcaceae_Faecalibacterium_prausnitzii_1 | CAGTGGGGAATATTGCACAATGGGGGAAACCCCTGATGCAGCAGCCGCGTGAGGGAAGAAGGCTTCCGGATTGTAAGCTCCTGTGTTGAGGAAGATAATGACGGTACTCAACAAGGAAGTACGGCTAACTACGTGCCAGCAGCCCGGTAATACGTATGGTGCAGAGCGTTGTCGGGAATTACTGGGTGTAAGGGGAGCGTAGGCGGGGAGAACAAAGTTGAAAGTGAATCTATGGGCTCAACCCATAAAGTGCCTTTCAAACCTGTTTTTCTTGAAGTGTGAGAGGTAGCGGGAATTCCTGGTGTAGCGGTGAAATGCGTAGATATTAGGAGGAACACCAGTGGCGAAGGCGGCTTACTGGACCAACTGACGCTGAGGCTCGAAAGTGTGGGTAGC           |
| ASV12  | Ruminococcaceae_Faecalibacterium_prausnitzii_2 | CAGTGGGGAATATTGCACAATGGGGGAAACCCCTGATGCAGCAGCCGCGTGAGGGAAGAAGGCTTCCGGATTGTAAGCTCCTGTGTTGAGGAAGATAATGACGGTACTCAACAAGGAAGTACGGCTAACTACGTGCCAGCAGCCCGGTAATACGTATGGTGCAGAGCGTTGTCGGGAATTACTGGGTGTAAGGGGAGCGTAGGCGGGGAGAACAAAGTTGAAAGTGAATCCATGGGCTCAACCCATGAAGTGCCTTTCAAACCTGTTTTTCTTGAAGTGTGAGAGGTAGCGGGAATTCCTGGTGTAGCGGTGAAATGCGTAGATATTAGGAGGAACACCAGTGGCGAAGGCGGCTTACTGGACCAACTGACGCTGAGGCTCGAAAGTGTGGGTAGC           |
| ASV182 | Ruminococcaceae_Flavonifractor_plautii_1       | CAGTGGGGAATATTGGGCAATGGGCGAAGCTGACCCAGCAACCGCCGCTGAAAGGAAGAAGGCTTCCGGTTGTAAGCTCTTTTGTCCGGGACGAAACAAATGACGGTACCCGAGCAATAGCCACGGCTAACTACGTGCCAGCAGCCCGGTAATACGTATGGGTGGGCAAGCGTTATCCGGATTACTGGGTGTAAGGGGAGCGTAGGCGGGGATTCGAAAGTGAATCCATGGGCTCAACCCATGAAGTGCCTTTCAAACCTGTTTTTCTTGAAGTGTGAGAGGTAGCGGGAATTCCTGGTGTAGCGGTGAAATGCGTAGATATTAGGAGGAACACCAGTGGCGAAGGCGGCTTACTGGACGATAACTGACGCTGAGGCTCGAAAGTGTGGGTAGC             |
| ASV214 | Ruminococcaceae_Intestinimonas_null_1          | CAGTGGGGAATATTGGGCAATGGGCGAAGCTGACCCAGCAACCGCCGCTGAAAGGAAGAAGGCTTCCGGTTGTAAGCTCTTTTGTCCGGGACGAAACAAATGACGGTACCCGAGCAATAGCCACGGCTAACTACGTGCCAGCAGCCCGGTAATACGTATGGTGGGCAAGCGTTATCCGGATTACTGGGTGTAAGGGGAGCGTAGGCGGGGAGAACAAAGTGAAGTGAATCCATGGGCTCAACCCATGAAGTGCCTTTCAAACCTGTTTTTCTTGAAGTGTGAGAGGTAGCGGGAATTCCTGGTGTAGCGGTGAAATGCGTAGATATTAGGAGGAACACCAGTGGCGAAGGCGGCTTACTGGACGATAACTGACGCTGAGGCTCGAAAGTGTGGGGAGC         |

|        |                                                |                                                                                                                                                                                                                                                                                                                                                                                                                                                                      |
|--------|------------------------------------------------|----------------------------------------------------------------------------------------------------------------------------------------------------------------------------------------------------------------------------------------------------------------------------------------------------------------------------------------------------------------------------------------------------------------------------------------------------------------------|
| ASV459 | Ruminococcaceae_null_null_10                   | CAGTGGGGAATTGGGCAATGGGCGAAGCCTGACCCAGCAACGCCCGGTGAAGGAAGAAGGCTTTCCGGTTGTAACTTCTTT<br>TGTCAGGGAAGATGAACAGACTGACCTGACGAATAAGCCACGGCTAACCTGACGCGCAGCCCGCGTAATACGTAGGTGGCAA<br>GCGTTGTCCGGATTACTGGGTGTAAGGGCGGTGAGCGGGATTGCAAGTCAGCCAGCCAGGGCTCAACCTTCCGCT<br>GCGTTGAAACTGTAGTCTTGTAGTACTGAGAGGTTGACCGAATTCCTAGTGTAGCGGTGAAATGCGTAGATATTAGGAGGAACA<br>CCAGTGGCGAAGCGGCTCACTGGACAGCAACTGACGCTGAGCGCGAAAGCGTGGGGA                                                          |
| ASV64  | Ruminococcaceae_Oscillibacter_null_1           | CAGTGGGGAATTGGGCAATGGACGAAGTCTGACCCAGCAACGCCCGGTGAAGGAAGAAGGCTTTCCGGTTGTAACTTCTTT<br>GTCAGGGAAGAGTAGAAGACGGTACCTGACGAATAAGCCACGGCTAACCTGACGCGCAGCCCGCGTAATACGTAGGTGGCAA<br>CGTTGTCCGGATTACTGGGTGTAAGGGCGGTGACGCGGGCGCAAGTCAAGTGTAAATCTGGAGGCTTAACCTCAAACCTG<br>CATTGAAACTGTAGGTTTGTAGTACCGGAGAGGTTATCGGAATTCCTGTGTAGCGGTGAAATGCGTAGATATAAGGAAGAACA<br>CAGTGGCGAAGCGGATTAACGGACGCAACTGACGCTGAGCGCGAAAGCGTGGGGA                                                        |
| ASV326 | Ruminococcaceae_Oscillibacter_null_2           | CAGTGGGGAATTGGGCAATGGACGAAGTCTGACCCAGCAACGCCCGGTGAAGGAAGAAGGCTTTCCGGTTGTAACTTCTTT<br>GTCAGGGAAGAGTAGAAGACGGTACCTGACGAATAAGCCACGGCTAACCTGACGCGCAGCCCGCGTAATACGTAGGTGGCAA<br>CGTTGTCCGGATTACTGGGTGTAAGGGCGGTGACGCGGGCGCAAGTCAAGTGTAAATCTGGAGGCTTAACCTCAAACCTG<br>GCGTTTAAACTGTAGTCTTGTAGTACCGGAGAGGTTATCGGAATTCCTGTGTAGCGGTGAAATGCGTAGATATAAGGAAGAACA<br>CCAGTGGCGAAGCGGATGACTGGACGCAACTGACGCTGAGCGCGAAAGCGTGGGGA                                                      |
| ASV336 | Ruminococcaceae_Oscillibacter_null_31          | CAGTGGGGAATTGGGCAATGGACGAAGTCTGACCCAGCAACGCCCGGTGAAGGAAGAAGGCTTTCCGGTTGTAACTTCTTT<br>GTCAGGGAAGAGTAGAAGACGGTACCTGACGAATAAGCCACGGCTAACCTGACGCGCAGCCCGCGTAATACGTAGGTGGCAA<br>GCGTTGTCCGGATTACTGGGTGTAAGGGCGGTGACGCGGGCGCAAGTCAAGTGTAAATCTGGAGGCTTAACCTCAAACCTG<br>CATTGAAACTGTAGTCTTGTAGTATCGGAGAGGTTATCGGAATTCCTAGTGTAGCGGTGAAATGCGTAGATATTAGGAAGAACA<br>CAGTGGCGAAGCGGATTAACGGACGCAACTGACGCTGAGCGCGAAAGCGTGGGGA                                                      |
| ASV431 | Ruminococcaceae_Phoecea_massiliensis           | CAGTGGGGATATTGCACAATGGAGGAACTGTAGCAGCAGCCCGGTGAGGGAAGACGGCTTCCGGATTGTAACTTCTGT<br>CTTTGGGGACGATAATGACGGTACCCAGGAGGAAGCTCCGGCTAACCTGACGCGCAGCCCGCGTAATACGTAGGTGGCAA<br>CGTTGTCCGGATTACTGGGTGTAAGGGCGGTGACGCGGGTCTCAAGTGTAAATCTACCGGCTCAACCTGGTAGCTGC<br>GTTGAAACTGTAGTCTTGTAGTACCGGAGAGGTTATCGGAATTCCTAGTGTAGCGGTGAAATGCGTAGATATTAGGAGGAACA<br>CAGTGGCGAAGCGGCTCTGGCTTTACTGACGCTGAGGCTCGAAAGCGTGGGAGCA                                                                |
| ASV173 | Ruminococcaceae_Ruminiclostridium_5_null_1     | CAGTGGGGATATTGGGCAATGGGGGAAACCTGACCCAGCAACGCCCGGTGAGGGAAGACGGCTTCCGGATTGTAACTTCTGT<br>CCTCTGTGAAGATAGTGACGGTACCCAGGAGGAAGCTCCGGCTAACCTGACGCGCAGCCCGCGTAATACGTAGGTGGCAA<br>CGTTGTCCGGATTACTGGGTGTAAGGGCGGTGACGCGGATGGCAAGTCAAGTGTAAATCTACCGGCTCAACCTGGTAGCTGC<br>TTTTGAAACTGTAGTCTTGTAGTGAAGTAGAGTAGGCGGAAATCCCGGTGAAATGCGTAGATATTAGGAGGAACA<br>AGTGGCGAAGCGGCTACTGGCTTTACTGACGCTGAGGCGCAAAAGTGTGGGTAGC                                                               |
| ASV433 | Ruminococcaceae_Ruminiclostridium_5_null_2     | CAGTGGGGATATTGCACAATGGGGGAAACCTGTAGCAGCAGCCCGGTGAGGGAAGACGGCTTCCGGATTGTAACTTCTGT<br>TCTGAGGATAGTACGGTACCCAGGAGGAAGCTCCGGCTAACCTGACGCGCAGCCCGCGTAATACGTAGGTGGCAA<br>GTTGTCCGGATTACTGGGTGTAAGGGCGGTGACGCGGATGGCAAGTCAAGTGTAAATCTACCGGCTCAACCTGGTAGCTGC<br>GTTTGAAGTGTAGTCTTGTAGTGAAGTAGAGTAGGCGGAAATCCCGGTGAAATGCGTAGATATTAGGAGGAACA<br>CAGTGGCGAAGCGGCTACTGGCTTTACTGACGCTGAGGCGCAAAAGCGTGGGAGCA                                                                       |
| ASV224 | Ruminococcaceae_Ruminiclostridium_9_null_1     | CAGTGGGGAATTGGGCAATGGGCGAAGCCTGACCCAGCAACGCCCGGTGAAGGAAGAAGGCTTTCCGGTTGTAACTTCTTT<br>TCTCAGGGACGAAAGCAAGTACCGTACCTGAGGAATAAGCCACGGCTAACCTGACGCGCAGCCCGCGTAATACGTAGGTGGCAA<br>AGCGTTATCCGGATTACTGGGTGTAAGGGCGGTGACGCGGGATGCAAGTGTAAATCTACCGGCTCAACCTGGTAGCTGC<br>TGCATTTGAAACTGTAGTCTTGTAGTACCGGAGGAGCAGCGGAATTCCTAGTGTAGCGGTGAAATGCGTAGATATTAGGAGGAACA<br>ACCAGTGGCGAAGCGGCTCTGCTGGACAGCAACTGACGCTGAGGCGCAAAAGCGTGGGGA                                               |
| ASV252 | Ruminococcaceae_Ruminiclostridium_9_null_2     | CAGTGGGGAATTGGGCAATGGGCGAAGCCTGACCCAGCAACGCCCGGTGAAGGAAGAAGGCTTTCCGGTTGTAACTTCTTT<br>TGTCAGGGACGAAAGCAAGTACCGTACCTGAGGAATAAGCCACGGCTAACCTGACGCGCAGCCCGCGTAATACGTAGGTGGCAA<br>AGCGTTATCCGGATTACTGGGTGTAAGGGCGGTGACGCGGGATGCAAGTGTAAATCTACCGGCTCAACCTGGTAGCTGC<br>TGCATTTGAAACTGTAGTCTTGTAGTACCGGAGGAGCAGATGGAATTCCTAGTGTAGCGGTGAAATGCGTAGATATTAGGAGGAACA<br>CCAGTGGCGAAGCGGATGCTGCTGGACAGCAACTGACGCTGAGGCGCAAAAGCGTGGGGA                                              |
| ASV376 | Ruminococcaceae_Ruminiclostridium_9_null_3     | CAGTGGGGAATTGGGCAATGGGCGAAGCCTGACCCAGCAACGCCCGGTGAAGGAAGAAGGCTTTCCGGTTGTAACTTCTTT<br>TCTCAGGGACGAAAGCAAGTACCGTACCTGAGGAATAAGCCACGGCTAACCTGACGCGCAGCCCGCGTAATACGTAGGTGGCAA<br>GAGCGTTATCCGGATTACTGGGTGTAAGGGCGGTGACGCGGGATGCAAGTGTAAATCTACCGGCTCAACCTGGTAGCTGC<br>TGCATTTGAAACTGTAGTCTTGTAGTACCGGAGGAGCAGCGGAATTCCTAGTGTAGCGGTGAAATGCGTAGATATTAGGAGGAACA<br>CACCAGTGGCGAAGCGGCTCTGCTGGACAGCAACTGACGCTGAGGCGCAAAAGCGTGGGGA                                             |
| ASV66  | Ruminococcaceae_Ruminococcaceae_UCG-002_null_2 | CAGTGGGGAATTGGGCAATGGGCGAAGCCTGACCCAGCAACGCCCGGTGAAGGAAGAAGGCTTTCCGGTTGTAACTTCTTT<br>TAAGAGGAAGAGCAGAACTGACCTGAGGAATAAGCCACGGCTAACCTGACGCGCAGCCCGCGTAATACGTAGGTGGCAA<br>GCGTTGTCCGGATTACTGGGTGTAAGGGCGGTGACGCGGGATGCAAGTGTAAATCTACCGGCTCAACCTGAACT<br>GCATTTGAAACTGTAGTCTTGTAGTACCGGAGGAGCAGCGGAATTCCTAGTGTAGCGGTGAAATGCGTAGATATTAGGAGGAACA<br>CAGTGGCGAAGCGGATGCTGCTGGACAGCAACTGACGCTGAGGCGCAAAAGCGTGGGGA                                                           |
| ASV55  | Ruminococcaceae_Ruminococcaceae_UCG-003_null_1 | CAGTGGGGAATTGGGCAATGGGCGAAGCCTGACCCAGCAACGCCCGGTGAAGGAAGAAGGCTTTCCGGTTGTAACTTCTTT<br>TGTCAGGGACGAAAGCAAGTACCGTACCTGAGGAATAAGCCACGGCTAACCTGACGCGCAGCCCGCGTAATACGTAGGTGGCAA<br>GCGTTGTCCGGATTACTGGGTGTAAGGGCGGTGACGCGGGATGCAAGTGTAAATCTACCGGCTCAACCTGAACT<br>GCATTTGAAACTGTAGTCTTGTAGTACCGGAGGAGGTTATCGGAATTCCTGTGTAGCGGTGAAATGCGTAGATATAAGGAAGAACA<br>CCAGTGGCGAAGCGGATTAACGGACGCAACTGACGCTGAGGCGCAAAAGCGTGGGGA                                                       |
| ASV116 | Ruminococcaceae_Ruminococcaceae_UCG-013_null_1 | CAGTGGGGAATTGGGCAATGGGCGAAGCCTGACCCAGCAACGCCCGGTGAAGGAAGAAGGCTTTCCGGTTGTAACTTCTTT<br>CGCAAGGGAAGAGCAGTACCGTACCTGAGGAATAAGCCACGGCTAACCTGACGCGCAGCCCGCGTAATACGTAGGTGGCAA<br>AGCGTTGTCCGGATTACTGGGTGTAAGGGCGGTGACGCGGGATGCAAGTGTAAATCTACCGGCTCAACCTGAACT<br>TGCATTTGAAACTGTAGTCTTGTAGTACCGGAGGAGCAGCGGAATTCCTAGTGTAGCGGTGAAATGCGTAGATATTAGGAGGAACA<br>ACCAGTGGCGAAGCGGCTTCTGCTGGACAGCAACTGACGCTGAGGCGCAAAAGCGTGGGGA                                                     |
| ASV32  | Ruminococcaceae_Subdoligranulum_null_1         | CAGTGGGGATATTGCACAATGGGGGAAACCTGTAGCAGCAGCCCGGTGAGGGAAGAAGGCTTTCCGGATTGTAACTTCTGT<br>CGTTAGGGACGATAATGACGGTACCTAACAGAAAGCACCAGGCTAACCTGACGCGCAGCCCGCGTAATACGTAGGTGGCAA<br>GTTGTCCGGATTACTGGGTGTAAGGGAGGCGAGGCGGGAAAGCAAGTGTGAAGTGTAAATCTACCGGCTCAACCTGAACT<br>TTTTAAACTGTTTTCTTGTAGTGTAGGAGGAGGTTATCGGAATTCCTGGTGTAGCGGTGAAATGCGTAGATATTAGGAGGAACA<br>AGTGGCGAAGCGGCTACTGGGCAACCTGACGCTGAGGCTCGAAAGCATGGGTAGC                                                        |
| ASV92  | Ruminococcaceae_Subdoligranulum_null_2         | CAGTGGGGATATTGCACAATGGGGGAAACCTGTAGCAGCAGCCCGGTGAGGGAAGAAGGCTTTCCGGATTGTAACTTCTGT<br>CGTTAGGGACGATAATGACGGTACCTAACAGAAAGCACCAGGCTAACCTGACGCGCAGCCCGCGTAATACGTAGGTGGCAA<br>GTTGTCCGGATTACTGGGTGTAAGGGAGGCGAGGCGGGAAAGCAAGTGTGAAGTGTAAATCTACCGGCTCAACCTGAACT<br>TTTTAAACTGTTTTCTTGTAGTGTAGGAGGAGGTTATCGGAATTCCTGGTGTAGCGGTGAAATGCGTAGATATTAGGAGGAACA<br>CAGTGGCGAAGCGGCTACTGGGCAACCTGACGCTGAGGCTCGAAAGCATGGGTAGC                                                       |
| ASV300 | Ruminococcaceae_UBA1819_null_1                 | CAGTGGGGAATTGCACAATGGGGGAAACCTGTAGCAGCAGCCCGGTGAGGGAAGAAGGCTTTCCGGATTGTAACTTCTGT<br>CCCAGGGGACGATAATGACGGTACCTAACAGAAAGCACCAGGCTAACCTGACGCGCAGCCCGCGTAATACGTAGGTGGCAA<br>GTTGTCCGGATTACTGGGTGTAAGGGAGGCGAGGCGGGAAAGCAAGTGTGAAGTGTAAATCTACCGGCTCAACCTGAACT<br>TTTTAAACTGTTTTCTTGTAGTGTAGGAGGAGGTTATCGGAATTCCTGGTGTAGCGGTGAAATGCGTAGATATTAGGAGGAACA<br>CCAGTGGCGAAGCGGCTACTGGGCAACCTGACGCTGAGGCTCGAAAGCATGGGTAGC                                                       |
| ASV488 | Saccharimonadaceae_null_null_1                 | CAGTGGGGAATTGGGCAATGGGCGAAGCCTGTAGGGAAGAAGGCTTTCCGGTTGTAACTTCTTT<br>ATGAGTGAAGAATATGACGGTACCTAACAGAAAGCACCAGGCTAACCTGACGCGCAGCCCGCGTAATACGTAGGTGGCAA<br>TATCCGGAGTACTGGGCGTAAAGAGTGTGCTAGGCGGTTTAAAGTGAATGTAAATCTACCGGCTCAACCTGAACT<br>GTTGTCCGGATTACTGGGTGTAAGGGAGGCGAGGCGGGATGCAAGTGTAAATCTACCGGCTCAACCTGAACT<br>TTTTAAACTGTTTTCTTGTAGTGTAGGAGGAGGTTATCGGAATTCCTGGTGTAGCGGTGAAATGCGTAGATATTAGGAGGAACA<br>CCAGTGGCGAAGCGGCTACTGGGCAACCTGACGCTGAGGCTCGAAAGCATGGGTAGC |

|        |                                       |                                                                                                                                                                                                                                                                                                                                                                                                                           |
|--------|---------------------------------------|---------------------------------------------------------------------------------------------------------------------------------------------------------------------------------------------------------------------------------------------------------------------------------------------------------------------------------------------------------------------------------------------------------------------------|
| ASV608 | Staphylococcaceae_Staphylococcus_null | CAGTAGGGAATCTTCGCAATGGCGAAAAGCCTGACGGAGCAACGCCGCGTGAGTGATGAAGGCTTCGGATCGTAAAACCTCTGT<br>TATTAGGGAAGAACATATGTGAAGTAACTGTGCACATCTTGACGGTACCTAATCAGAAAGCCACGGCTAACTACGTGCCAGCAGC<br>CGCGGTAATACGTAGGTGGCAAGCGTTATCCGGAATTATTGGCGTAAAGCGCGGTAGGCGGTTTTTAAGTCTGATGTGAAAGC<br>CCACGGCTCAACCGTGGAGGGTCAATTGAAAACCTGAAAACCTTGAGTGCAGAAAGGAAAGTGAATTCCATGTAGCGGTGAA<br>TGCGCAGAGATATGGAGGAACACCAGTGGCGAAGGCGACTTTCTGGTCTGTAACCTGAC |
| ASV21  | Tannerellaceae_Parabacteroides_merdae | CAGTGAGGAATATTGGTCAATGGCCGAGAGGCTGAACCAGCCAAGTCGCGTGAAGGAAGAAGGATCATGGTTTGTAAACTCTTT<br>TATAGGGAATAAAGTGGAGGACGTGCTTTTTTGTATGTACCTATGAATAAGCATCGCTAACTCCGTGCCAGCAGCGCGGT<br>AATACGGAGGATGCGAGCGTTATCCGATTTATGGGTTTAAAGGGTGCCTAGGTGGTGAATTAAGTACGCGGTGAAAGTTTGTGG<br>CTCAACCATAAAATTGCCGTTGAAAACGGTTACTTGAGTGTGTTTGAAGTAGGCGGAATGCGTGGTGTAGCGGTGAAATGCATAG<br>ATATCACGCAGAACTCCGATTGCGAAGGCGAGCTTACTAAACCATAACTGACACTGA    |
| ASV286 | Thermomicrobiaceae_Thermorudis_null_1 | CAGCAGGGAATCTTCGCAATGGGCGCAAGCCTGACGGAGCGACGCCGCGTGAAGGATGACGCCCTTCGGGGTGTAAACTCCTG<br>TTCGGGGGACGAAGGTGGTACGGTACCCCGGAGCAAGCCCGGCTAACTACGTGCCAGCAGCCGCGTAACACGTAGGGG<br>GCGAGCGTTGCCGGAATCACTGGGCGTAAAGGGCGCGTAGGCGGCTGGCGCGCCGCTCGTAAAAGCCCGGCTCAACCGG<br>GGAGGGTCGGGCGGACGGCCGGCTCGAGGGCGGAGAGGCGGGTGAATTCCCGGTGAGCGGTGAAATGCGTAGAGATC<br>GGAGGAACACCGGTGGCGAAGCGGCCGCTGGCCGCTGACGCTGAGGCGCAAGGCGTGGG                  |
| ASV113 | Veillonellaceae_Veillonella_dispar    | CAGTGGGGAATCTTCGCAATGGAGCAAAAGTCTGACGGAGCAACGCCGCGTGAGTGATGACGGCTTCGGGTTGTAAAGCTCTGT<br>TAATCGGACGAAAGGCCCTTCTTGCGAATAGTTAGAAGGATTGACGGTACCGGAATAGAAAGCCACGGCTAACTAGGTGCCAGCA<br>GCCCGGTAATACGTAGGTGGCAAGCGTTGTCGGAATTATTGGCGTAAAGCGCGCAGGCGGATTGGTCACTGTCTTAAA<br>AGTTCCGGGCTTAACCCGCTGATGGGATGAAAACCTGCAATCTAGAGTATCGGAGAGGAAAGTGAATTCCCTAGTGTAGCGGTGA<br>AATCGTAGATATTAGGAAGAACCAGTGGCGAAGGCGACTTTCTGGACGAAAACCTGAC    |

1. Quast C, Pruesse E, Yilmaz P, Gerken J, Schweer T, Yarza P, et al. The SILVA ribosomal RNA gene database project: improved data processing and web-based tools. *Nucleic Acids Res.* 2013;41:D590-6.

## Supplementary Information Table 2-SI.

DADA2/ADLEx2/PIME pipeline analysis of 86 unique sequence ASV dataset for depression (DEPR) and healthy reference control (NODEP) subjects. The 86 ASV dataset was derived from the 55% prevalence bin of PIME extracted from the initial DADA2 dataset of 2724 ASV amplicons. ALDEx2 effect sizes < 0 represent DEPR, and > 0 represent NODEP.

| Unique Seq Code | Family Genus_species                                 | effect size | rab.win DEPR | rab.win NODEP | overlap | rab.all | diff.btw | diff.win | we.ep  | we.eBH | wi.ep  | wi.eBH |
|-----------------|------------------------------------------------------|-------------|--------------|---------------|---------|---------|----------|----------|--------|--------|--------|--------|
| ASV1            | Acidaminococcaceae_Phascolartobacterium_faecium      | -0.7632     | 0.2197       | -4.2553       | 0.1491  | -2.4685 | -5.5643  | 7.7371   | 0.0016 | 0.0036 | 0.0009 | 0.0022 |
| ASV2            | Bacteroidaceae_Bacteroides_vulgatus_1                | -0.2121     | 8.5352       | 7.0587        | 0.3625  | 7.7828  | -1.6981  | 7.3354   | 0.2916 | 0.3925 | 0.1390 | 0.2062 |
| ASV3            | Bacteroidaceae_Bacteroides_stercoris_1               | -1.1056     | 4.9995       | -4.0966       | 0.1281  | -2.2560 | -9.6559  | 7.6155   | 0.0001 | 0.0003 | 0.0002 | 0.0005 |
| ASV4            | Bacteroidaceae_Bacteroides_uniformis_1               | -0.1444     | 6.6635       | 6.1779        | 0.4000  | 6.4986  | -1.2615  | 10.0640  | 0.3379 | 0.4368 | 0.2463 | 0.3385 |
| ASV9            | Ruminococcaceae_Faecalibacterium_null_1              | -0.0855     | 6.7929       | 5.9742        | 0.4625  | 6.4187  | -0.3489  | 3.6278   | 0.4379 | 0.5386 | 0.7422 | 0.8028 |
| ASV10           | Ruminococcaceae_Faecalibacterium_prausnitzii_1       | -0.0449     | 6.2205       | 5.8725        | 0.4473  | 6.0406  | -0.2851  | 6.1002   | 0.7182 | 0.7777 | 0.5920 | 0.6839 |
| ASV12           | Ruminococcaceae_Faecalibacterium_prausnitzii_2       | 0.1947      | 3.8009       | 5.6226        | 0.4109  | 5.2652  | 1.2463   | 7.0998   | 0.3074 | 0.4073 | 0.4278 | 0.5380 |
| ASV17           | Lachnospiraceae_Agathobacter_null_1                  | 0.0679      | 5.4076       | 5.5587        | 0.4614  | 5.5055  | 0.3479   | 3.7714   | 0.2637 | 0.3671 | 0.7365 | 0.8002 |
| ASV19           | Rikenellaceae_Alistipes_putredinis                   | -0.0646     | 5.9198       | 5.3244        | 0.4586  | 5.3818  | -0.4986  | 8.0469   | 0.5710 | 0.6488 | 0.6204 | 0.7106 |
| ASV21           | Tannerellaceae_Parabacteroides_merdae                | -1.6707     | 6.3017       | -4.3226       | 0.0688  | -1.8771 | -10.2477 | 5.2508   | 0.0000 | 0.0000 | 0.0000 | 0.0000 |
| ASV28           | Rikenellaceae_Alistipes_null_1                       | -0.1706     | 2.8514       | 1.3441        | 0.4309  | 1.7021  | -1.1737  | 6.6665   | 0.4541 | 0.5391 | 0.4905 | 0.5891 |
| ASV29           | Lachnospiraceae_Lachnospira_pectinoschiza_1          | -0.0358     | 3.8763       | 3.8480        | 0.4723  | 3.8508  | -0.2728  | 6.9759   | 0.7412 | 0.7967 | 0.7180 | 0.7843 |
| ASV32           | Ruminococcaceae_Subdoligranulum_null_1               | -0.0573     | 4.1562       | 4.0256        | 0.4606  | 4.0745  | -0.3503  | 6.1722   | 0.7209 | 0.7767 | 0.7142 | 0.7821 |
| ASV33           | Bacteroidaceae_Bacteroides_null_5                    | -1.4692     | 5.1989       | -4.2453       | 0.0852  | -1.9930 | -8.9318  | 5.6543   | 0.0000 | 0.0000 | 0.0000 | 0.0000 |
| ASV41           | Enterobacteriaceae_Escherichia/Shigella_null_1       | -1.2426     | 2.0264       | -4.1074       | 0.0781  | -1.7846 | -6.6952  | 5.2170   | 0.0001 | 0.0002 | 0.0000 | 0.0000 |
| ASV45           | Bacteroidaceae_Bacteroides_thetaiotaomicron_1        | -0.2152     | 3.7820       | 2.8848        | 0.3849  | 3.3965  | -1.6046  | 7.1798   | 0.3165 | 0.4096 | 0.2202 | 0.3070 |
| ASV58           | Lachnospiraceae_Fusicatenibacter_saccharivorans      | 0.0773      | 3.9478       | 3.9326        | 0.4633  | 3.9388  | 0.2406   | 2.5851   | 0.3085 | 0.4113 | 0.7002 | 0.7705 |
| ASV64           | Ruminococcaceae_Oscillibacter_null_1                 | -0.5499     | 4.5708       | 2.7877        | 0.2539  | 3.8090  | -1.5816  | 2.5385   | 0.0881 | 0.1373 | 0.0075 | 0.0156 |
| ASV67           | Lachnospiraceae_Lachnospiraceae_NK4A136_group_null_2 | 0.1036      | 3.1841       | 3.6882        | 0.4426  | 3.3667  | 0.6623   | 5.1092   | 0.5433 | 0.6261 | 0.5871 | 0.6827 |
| ASV70           | Coriobacteriaceae_Collinsella_aerofaciens            | -0.1652     | 3.8140       | 2.7821        | 0.4223  | 3.1092  | -0.6675  | 3.5818   | 0.6658 | 0.7332 | 0.4600 | 0.5657 |
| ASV92           | Ruminococcaceae_Subdoligranulum_null_2               | -0.3175     | 3.2660       | 2.0085        | 0.3320  | 2.2912  | -1.6539  | 4.6171   | 0.2660 | 0.3479 | 0.0677 | 0.1075 |
| ASV96           | Lachnospiraceae_Anaerostipes_hadrus_1                | -0.1057     | 2.2189       | 1.7820        | 0.4352  | 1.9843  | -0.5781  | 5.6244   | 0.4078 | 0.4981 | 0.4838 | 0.5843 |
| ASV99           | Lachnospiraceae_Roseburia_hominis                    | -0.1888     | 2.2467       | 1.5332        | 0.4020  | 1.6954  | -1.2907  | 6.2158   | 0.4120 | 0.4970 | 0.3405 | 0.4408 |
| ASV108          | Lachnospiraceae_Roseburia_nullinivorans              | -0.0057     | 2.6582       | 2.8028        | 0.4969  | 2.7404  | -0.0374  | 4.9286   | 0.7165 | 0.7737 | 0.8902 | 0.9151 |
| ASV113          | Veillonellaceae_Veillonella_dispar                   | -0.4236     | 3.1535       | 1.2978        | 0.2766  | 2.2669  | -2.3821  | 4.8844   | 0.0427 | 0.0750 | 0.0191 | 0.0351 |
| ASV115          | Lachnospiraceae_Blautia_null_1                       | -0.4817     | 4.1168       | 2.5116        | 0.2641  | 3.2940  | -1.2929  | 2.2366   | 0.0386 | 0.0715 | 0.0144 | 0.0273 |
| ASV116          | Ruminococcaceae_Ruminococcaceae_UCG-013_null_1       | -0.1164     | 2.3325       | 1.7779        | 0.4325  | 1.8943  | -0.6891  | 4.6256   | 0.4885 | 0.5705 | 0.4815 | 0.5821 |
| ASV137          | Lachnospiraceae_Lachnoclostridium_null_4             | -0.5057     | 2.9073       | 0.0827        | 0.2795  | 1.1656  | -3.0548  | 5.6599   | 0.0365 | 0.0661 | 0.0226 | 0.0404 |
| ASV138          | Lachnospiraceae_Dorea_longicatena                    | -0.0019     | 2.4470       | 1.7840        | 0.4980  | 2.0753  | -0.0111  | 3.6343   | 0.4125 | 0.5046 | 0.8287 | 0.8677 |
| ASV140          | Lachnospiraceae_Lachnoclostridium_null_5             | -0.9660     | 1.1799       | -4.2125       | 0.1328  | -2.3564 | -5.7232  | 5.6241   | 0.0003 | 0.0010 | 0.0003 | 0.0007 |
| ASV156          | Lachnospiraceae_Blautia_obsum                        | -0.2939     | 2.2592       | 0.7151        | 0.3453  | 1.3703  | -1.5774  | 4.4231   | 0.2500 | 0.3332 | 0.1162 | 0.1736 |
| ASV170          | Desulfovibrionaceae_Bilophia_wadsworthia_1           | -0.3609     | 2.2347       | 0.3465        | 0.3294  | 1.3087  | -2.1620  | 5.4942   | 0.1265 | 0.1853 | 0.0750 | 0.1161 |
| ASV173          | Ruminococcaceae_Ruminiclostridium_5_null_1           | -0.2599     | 2.1354       | 0.2714        | 0.3583  | 0.8908  | -1.5359  | 5.6574   | 0.2716 | 0.3547 | 0.1393 | 0.2026 |
| ASV177          | Lachnospiraceae_Coprococcus_3_comes                  | -0.0819     | 1.6547       | 1.2774        | 0.4250  | 1.3941  | -0.4600  | 4.5697   | 0.6680 | 0.7317 | 0.6839 | 0.7532 |
| ASV182          | Ruminococcaceae_Flavonifractor_plautii_1             | -1.2940     | 2.5295       | -4.2731       | 0.0999  | -2.0273 | -7.2173  | 5.0896   | 0.0001 | 0.0003 | 0.0000 | 0.0002 |
| ASV186          | Ruminococcaceae_Butyricoccus_null_1                  | -0.0446     | 2.0186       | 1.6603        | 0.4707  | 1.7801  | -0.2459  | 4.6412   | 0.6890 | 0.7515 | 0.7510 | 0.8048 |
| ASV192          | Lachnospiraceae_Lachnoclostridium_null_7             | -0.0102     | 1.0394       | 0.4862        | 0.4965  | 0.6848  | -0.0593  | 5.0949   | 0.7332 | 0.7874 | 0.8266 | 0.8657 |
| ASV214          | Ruminococcaceae_Intestinimonas_null_1                | -0.1880     | 2.3669       | 1.3713        | 0.3934  | 1.8598  | -0.6746  | 2.7558   | 0.4991 | 0.5768 | 0.2493 | 0.3340 |
| ASV221          | Lachnospiraceae_Blautia_massiliensis_1               | -0.0872     | 2.2896       | 1.5073        | 0.4598  | 1.7463  | -0.3464  | 3.1949   | 0.7216 | 0.7781 | 0.6882 | 0.7548 |
| ASV224          | Ruminococcaceae_Ruminiclostridium_9_null_1           | -1.1020     | 2.8231       | -4.3209       | 0.1413  | -2.4302 | -6.9083  | 5.5429   | 0.0004 | 0.0012 | 0.0004 | 0.0010 |
| ASV234          | Lachnospiraceae_Blautia_faecis                       | -0.1254     | 1.3817       | 0.5938        | 0.4426  | 0.9704  | -0.5452  | 3.8027   | 0.6328 | 0.6994 | 0.5338 | 0.6222 |
| ASV251          | Lachnospiraceae_null_null_6                          | -0.2684     | 1.6218       | 0.0854        | 0.3492  | 0.7941  | -1.4270  | 4.5649   | 0.2393 | 0.3143 | 0.1337 | 0.1938 |
| ASV286          | Thermomicrobiaceae_Thermotoga_null_1                 | -0.2270     | 0.5323       | -0.3340       | 0.3984  | 0.1841  | -1.2479  | 5.1823   | 0.2399 | 0.3222 | 0.3296 | 0.4240 |
| ASV300          | Ruminococcaceae_UBA1819_null_1                       | -0.3379     | 1.4230       | -0.4379       | 0.3117  | 0.3417  | -1.5791  | 3.8181   | 0.1793 | 0.2441 | 0.0619 | 0.0971 |
| ASV306          | Lachnospiraceae_null_null_10                         | -0.0461     | 0.9356       | -4.2310       | 0.1336  | -2.2223 | -5.2952  | 4.6977   | 0.0005 | 0.0014 | 0.0002 | 0.0007 |
| ASV311          | Lachnospiraceae_Dorea_formicigenerans                | -0.0745     | 0.8528       | 0.3430        | 0.4614  | 0.5386  | -0.3294  | 3.6028   | 0.6939 | 0.7545 | 0.6866 | 0.7465 |
| ASV320          | Lachnospiraceae_null_null_12                         | -0.8389     | -0.1525      | -4.2391       | 0.1553  | -2.5296 | -4.8474  | 5.3229   | 0.0015 | 0.0035 | 0.0009 | 0.0021 |
| ASV322          | Lachnospiraceae_Coprococcus_1_catus                  | -0.1448     | 0.7790       | -0.2052       | 0.4227  | 0.2845  | -0.6992  | 3.8564   | 0.4725 | 0.5538 | 0.4248 | 0.5165 |
| ASV326          | Ruminococcaceae_Oscillibacter_null_2                 | -0.4242     | 1.6109       | -0.2355       | 0.2609  | 0.6104  | -1.8889  | 3.5819   | 0.1142 | 0.1646 | 0.0149 | 0.0275 |
| ASV338          | Lachnospiraceae_Lachnoclostridium_null_8             | -1.1597     | 1.0783       | -4.2207       | 0.0945  | -2.0754 | -5.7493  | 4.5873   | 0.0001 | 0.0002 | 0.0000 | 0.0001 |
| ASV376          | Ruminococcaceae_Ruminiclostridium_9_null_3           | -0.3970     | 1.2850       | -0.5476       | 0.3044  | 0.3022  | -1.9083  | 4.2046   | 0.0689 | 0.1110 | 0.0398 | 0.0659 |
| ASV431          | Ruminococcaceae_Phocaea_massiliensis                 | -1.1218     | 0.5488       | -4.2578       | 0.1109  | -2.0957 | -5.1253  | 4.1511   | 0.0011 | 0.0024 | 0.0001 | 0.0003 |
| ASV433          | Ruminococcaceae_Ruminiclostridium_5_null_2           | -0.4535     | 0.9450       | -1.5489       | 0.2797  | -0.3762 | -2.1209  | 4.1969   | 0.0792 | 0.1194 | 0.0265 | 0.0447 |
| ASV459          | Ruminococcaceae_null_null_10                         | -1.0596     | 0.4320       | -4.2789       | 0.1085  | -2.1044 | -4.8107  | 3.9893   | 0.0014 | 0.0029 | 0.0001 | 0.0002 |
| ASV464          | Erysipelotrichaceae_Holdemania_filiformis            | -0.8307     | -0.1819      | -4.2094       | 0.1671  | -2.5037 | -3.9584  | 4.1752   | 0.0047 | 0.0093 | 0.0012 | 0.0028 |
| ASV488          | Saccharimonadaceae_null_null_1                       | -0.9261     | 0.1350       | -4.2671       | 0.1390  | -2.4878 | -4.4553  | 4.4450   | 0.0013 | 0.0032 | 0.0006 | 0.0014 |
| ASV13           | Bacteroidaceae_Bacteroides_null_3                    | 0.8060      | -2.8847      | 2.1342        | 0.2266  | -1.6435 | 5.8257   | 7.0572   | 0.0029 | 0.0070 | 0.0052 | 0.0107 |
| ASV15           | Bacteroidaceae_Bacteroides_vulgatus_2                | 1.0402      | -2.8810      | 5.5275        | 0.1852  | -1.4011 | 7.9367   | 6.3948   | 0.0004 | 0.0012 | 0.0012 | 0.0030 |
| ASV22           | Ruminococcaceae_Faecalibacterium_CM04-06             | 1.7396      | -2.8928      | 4.2410        | 0.0500  | -0.0039 | 7.1327   | 3.8336   | 0.0000 | 0.0001 | 0.0000 | 0.0000 |
| ASV35           | Bacteroidaceae_Bacteroides_null_6                    | 0.6978      | -2.8303      | 1.9891        | 0.2319  | -1.5611 | 4.7150   | 5.9722   | 0.0134 | 0.0259 | 0.0072 | 0.0143 |
| ASV51           | Lachnospiraceae_Lachnoclostridium_null_1             | 1.4101      | -2.8643      | 3.6136        | 0.0977  | -0.4410 | 6.2554   | 4.0907   | 0.0001 | 0.0003 | 0.0000 | 0.0000 |
| ASV55           | Ruminococcaceae_Ruminococcaceae_UCG-003_null_1       | 1.0477      | -2.8264      | 3.1175        | 0.1405  | -0.9905 | 5.5751   | 4.6856   | 0.0009 | 0.0020 | 0.0002 | 0.0005 |
| ASV60           | Lachnospiraceae_Lachnospiraceae_NK4A136_group_null_1 | 1.2324      | -2.7418      | 2.8052        | 0.0898  | -0.4101 | 5.5657   | 4.2401   | 0.0001 | 0.0002 | 0.0000 | 0.0000 |
| ASV66           | Ruminococcaceae_Ruminococcaceae_UCG-002_null_2       | 0.8749      | -2.8075      | 2.7399        | 0.1766  | -1.2752 | 4.9437   | 5.0643   | 0.0017 | 0.0041 | 0.0008 | 0.0021 |
| ASV73           | Lachnospiraceae_Agathobacter_null_2                  | 0.8038      | -2.8106      | 2.3368        | 0.1975  | -1.3992 | 4.9191   | 5.5587   | 0.0080 | 0.0155 | 0.0018 | 0.0044 |
| ASV90           | Lachnospiraceae_Lachnospiraceae_NK4A136_group_null_3 | 0.7153      | -2.8524      | 2.5907        | 0.2242  | -1.5669 | 4.9229   | 5.9038   | 0.0081 | 0.0167 | 0.0048 | 0.0102 |
| ASV95           | Lachnospiraceae_Roseburia_intestinalis               | 1.0122      | -2.9405      | 2.7688        | 0.1624  | -0.9906 | 5.5807   | 4.8619   | 0.0016 | 0.0036 | 0.0003 | 0.0009 |
| ASV107          | Lachnospiraceae_Lachnospira_null_2                   | 0.6771      | -2.8538      | 2.1675        | 0.2469  | -1.7147 | 4.2531   | 5.6952   | 0.0226 | 0.0397 | 0.0133 | 0.0241 |
| ASV118          | Lachnospiraceae_Lachnoclostridium_null_3             | 0.9131      | -2.8777      | 2.1737        | 0.1514  | -0.9875 | 4.7507   | 4.6133   | 0.0036 | 0.0071 | 0.0003 | 0.0008 |
| ASV121          | Lachnospiraceae_Lachnospiraceae_NK4A136_group_null_4 | 0.9613      | -2.7119      | 2.3796        | 0.1460  | -0.8311 | 4.8885   | 4.5721   | 0.0019 | 0.0045 | 0.0002 | 0.0006 |
| ASV130          | Lachnospiraceae_Lachnospiraceae_UCG-001_null_20      | 1.3246      | -2.8762      | 3.2136        | 0.0883  | -0.4143 | 5.8216   | 3.9421   | 0.0001 | 0.0002 | 0.0000 | 0.0000 |
| ASV139          | Lachnospiraceae_Lachnospira_pectinoschiza_2          | 0.7763      | -2.8363      | 1.0608        | 0.1866  | -1.3027 | 4.4138   | 5.1571   | 0.0039 | 0.0088 | 0.0020 | 0.0046 |
| ASV146          | Lachnospiraceae_Lachnospiraceae_UCG-001_null_21      | 0.6862      | -2.8564      | 1.0784        | 0.2194  | -1.4801 | 3.8825   | 5.1681   | 0.0150 | 0.0284 | 0.0045 | 0.0095 |
| ASV155          | Ruminococcaceae_Faecalibacterium_null_2              | 0.6040      | -2.8529      | 0.8448        | 0.2654  | -1.7946 | 3.6724   | 5.2345   | 0.0339 | 0.0583 | 0.0186 | 0.0325 |
| ASV172          | Lachnospiraceae_Lachnospiraceae_UCG-001_null_1       | 0.5265      | -2.8553      | 0.1614        | 0.2742  | -1.7732 | 2.8448   | 4.9658   | 0.0549 | 0.0878 | 0.0286 | 0.0473 |
| ASV196          | Lachnospiraceae_Lachnospiraceae_ND3007_group_null_1  | 0.8634      | -2.9857      | 1.4979        | 0.1530  | -1.0410 | 4.0025   | 4.2200   | 0.0038 | 0.0078 | 0.0007 | 0.0016 |
| ASV215          | Lachnospiraceae_CAG-56_null_1                        | 0.6313      | -2.9125      | 0.1648        | 0.2287  | -1.5800 | 3.3358   | 4.6842   | 0.0307 | 0.0499 | 0.0105 | 0.0194 |
| ASV252          | Ruminococc                                           |             |              |               |         |         |          |          |        |        |        |        |
